# Supplementary material for: Identification of Tissue-Specific DNA Methylation Signatures for Thyroid Nodule Diagnostics
Source: Oxford University Press journal article supplement (doi:10.1158/1078-0432.ccr-18-0841), 2018-08-09
Supplement: 10780432ccr180841-sup-198566_2_supp_4898088_pcg792.xlsx [file 10780432ccr180841-sup-198566_2_supp_4898088_pcg792.xlsx]

## Sheet: Suppl. Table 2
Table S2. Genomic locations associated with benign and malignant epigenetic signatures for thyroid nodule diagnostics and an association of these locations with H3K27Ac peaks and H3K27Ac associated areas (peaks including enhancer shores).
Chr	Start	End	Symbol	Promoter	Gene Body	Signature "Benign" (B) or "Malignant" (M)	7N H3K27Ac peak	10N H3K27Ac peak	7N H3K27Ac peak +/- 1kb	10N H3K27Ac peak +/- 1kb
chr1	1007462	1007462		No	No	M	No	No	No	No
chr1	2996653	2996653	PRDM16	No	Yes	B	No	Yes	No	Yes
chr1	11979164	11979164		No	No	M	No	No	No	No
chr1	12655938	12655938	DHRS3	No	Yes	B	Yes	Yes	Yes	Yes
chr1	12656132	12656132	DHRS3	No	Yes	B	Yes	Yes	Yes	Yes
chr1	16450525	16450525		No	No	M	No	No	No	No
chr1	16450542	16450542		No	No	M	No	No	No	No
chr1	16450545	16450545		No	No	M	No	No	No	No
chr1	16469987	16469987	EPHA2	No	Yes	M	Yes	Yes	Yes	Yes
chr1	17494491	17494491		No	No	M	Yes	Yes	Yes	Yes
chr1	25473203	25473203		No	No	M	Yes	Yes	Yes	Yes
chr1	27640460	27640460		No	No	B	No	No	No	No
chr1	29565080	29565080	PTPRU	No	Yes	B	No	No	No	No
chr1	38493013	38493013		No	No	M	No	No	No	No
chr1	38493030	38493030		No	No	M	No	No	No	No
chr1	38493074	38493074		No	No	M	No	No	No	No
chr1	46713777	46713777	RAD54L	Yes	No	B	Yes	Yes	Yes	Yes
chr1	46914121	46914121		No	No	B	No	No	No	No
chr1	46955744	46955744		No	No	B	No	No	No	No
chr1	55008344	55008344		No	No	B	No	No	No	No
chr1	109816092	109816092	CELSR2	No	Yes	M	Yes	Yes	Yes	Yes
chr1	109816111	109816111	CELSR2	No	Yes	M	Yes	Yes	Yes	Yes
chr1	110074669	110074669		No	No	M	No	No	No	No
chr1	110074681	110074681		No	No	M	No	No	No	No
chr1	110074685	110074685		No	No	M	No	No	No	No
chr1	150949856	150949856		No	No	M	Yes	Yes	Yes	Yes
chr1	150949857	150949857		No	No	M	Yes	Yes	Yes	Yes
chr1	153540282	153540282		No	No	M	Yes	Yes	Yes	Yes
chr1	155162704	155162704	MUC1	Yes	No	M	Yes	Yes	Yes	Yes
chr1	155162714	155162714	MUC1	Yes	No	M	Yes	Yes	Yes	Yes
chr1	156676611	156676611	CRABP2	Yes	No	B	Yes	Yes	Yes	Yes
chr1	157611881	157611881		No	No	M	No	No	No	No
chr1	182205324	182205324		No	No	M	No	No	No	No
chr1	204118999	204118999	ETNK2	No	Yes	M	No	No	No	No
chr1	206741875	206741875	RASSF5	No	Yes	M	No	No	No	No
chr1	206741989	206741989	RASSF5	No	Yes	M	No	No	No	No
chr1	212587673	212587673	TMEM206	No	Yes	B	No	No	No	No
chr1	212841198	212841198		No	No	M	Yes	No	Yes	No
chr1	223403952	223403952	SUSD4	No	Yes	M	No	No	No	No
chr1	233430972	233430972	PCNXL2	Yes	No	B	Yes	Yes	Yes	Yes
chr1	234342767	234342767	SLC35F3	No	Yes	M	No	No	No	No
chr10	3929071	3929071		No	No	M	Yes	No	Yes	No
chr10	30047012	30047012		No	No	M	No	No	No	No
chr10	79702989	79702989		No	No	M	No	No	No	No
chr10	87984905	87984905	GRID1	No	Yes	M	Yes	Yes	Yes	Yes
chr10	94838789	94838789		No	No	M	No	No	No	No
chr10	102131157	102131157		No	No	M	Yes	No	Yes	No
chr10	102131187	102131187		No	No	M	Yes	No	Yes	No
chr10	104196489	104196489	MIR146B	Yes	No	M	No	No	No	No
chr10	111766879	111766879	ADD3	Yes	Yes	M	Yes	Yes	Yes	Yes
chr10	112258886	112258886	DUSP5	No	Yes	M	Yes	No	Yes	No
chr10	112258984	112258984	DUSP5	No	Yes	M	Yes	No	Yes	No
chr10	112259015	112259015	DUSP5	No	Yes	M	Yes	No	Yes	No
chr10	116391763	116391763	ABLIM1	No	Yes	B	Yes	Yes	Yes	Yes
chr10	120011530	120011530		No	No	M	No	No	No	No
chr10	126172714	126172714	LHPP	No	Yes	B	No	Yes	No	Yes
chr10	126172747	126172747	LHPP	No	Yes	B	No	Yes	No	Yes
chr11	556355	556355	C11orf35	No	Yes	B	No	No	No	No
chr11	821282	821282	PNPLA2	No	Yes	M	Yes	No	Yes	No
chr11	12188937	12188937	MICAL2	No	Yes	M	Yes	No	Yes	No
chr11	12188948	12188948	MICAL2	No	Yes	M	Yes	No	Yes	No
chr11	12188995	12188995	MICAL2	No	Yes	M	Yes	No	Yes	No
chr11	36057726	36057726	LDLRAD3	No	Yes	B	No	No	No	No
chr11	48070143	48070143	PTPRJ	No	Yes	B	Yes	Yes	Yes	Yes
chr11	48070163	48070163	PTPRJ	No	Yes	B	Yes	Yes	Yes	Yes
chr11	48070166	48070166	PTPRJ	No	Yes	B	Yes	Yes	Yes	Yes
chr11	48070174	48070174	PTPRJ	No	Yes	B	Yes	Yes	Yes	Yes
chr11	65158294	65158294	FRMD8	No	Yes	M	Yes	Yes	Yes	Yes
chr11	65158342	65158342	FRMD8	No	Yes	M	Yes	Yes	Yes	Yes
chr11	65297089	65297089	SCYL1	No	Yes	M	No	No	No	No
chr11	66104481	66104481	RIN1	Yes	No	M	Yes	No	Yes	No
chr11	66104485	66104485	RIN1	Yes	No	M	Yes	No	Yes	No
chr11	66104578	66104578	RIN1	Yes	No	M	Yes	No	Yes	No
chr11	68608767	68608767	CPT1A	No	Yes	B	Yes	Yes	Yes	Yes
chr11	70236292	70236292		No	No	M	Yes	Yes	Yes	Yes
chr11	70236320	70236320		No	No	M	Yes	Yes	Yes	Yes
chr11	70236331	70236331		No	No	M	Yes	Yes	Yes	Yes
chr11	115530032	115530032		No	No	B	No	No	No	No
chr11	117950310	117950310	TMPRSS4	No	Yes	M	No	No	No	No
chr11	117950329	117950329	TMPRSS4	No	Yes	M	No	No	No	No
chr11	117950361	117950361	TMPRSS4	No	Yes	M	No	No	No	No
chr11	117950362	117950362	TMPRSS4	No	Yes	M	No	No	No	No
chr11	119293593	119293593	THY1	No	Yes	B	No	No	No	Yes
chr12	679803	679803	NINJ2	No	Yes	M	Yes	No	Yes	No
chr12	26039132	26039132		No	No	M	No	No	No	No
chr12	31004558	31004558		No	No	B	No	No	No	No
chr12	45610695	45610695	PLEKHA9	Yes	Yes	B	Yes	Yes	Yes	Yes
chr12	45610701	45610701	PLEKHA9	Yes	Yes	B	Yes	Yes	Yes	Yes
chr12	45610702	45610702	PLEKHA9	Yes	Yes	B	Yes	Yes	Yes	Yes
chr12	45610706	45610706	PLEKHA9	Yes	Yes	B	Yes	Yes	Yes	Yes
chr12	50286016	50286016	FAIM2	No	Yes	M	No	No	No	No
chr12	52243258	52243258		No	No	M	No	No	Yes	No
chr12	52243286	52243286		No	No	M	No	No	Yes	No
chr12	54145732	54145732		No	No	B	Yes	No	Yes	No
chr12	54145741	54145741		No	No	B	Yes	No	Yes	No
chr12	54145825	54145825		No	No	B	Yes	No	Yes	No
chr12	56115043	56115043	RDH5	No	Yes	M	Yes	No	Yes	No
chr12	66262229	66262229	HMGA2	No	Yes	M	No	No	No	No
chr12	66262230	66262230	HMGA2	No	Yes	M	No	No	No	No
chr12	66262233	66262233	HMGA2	No	Yes	M	No	No	No	No
chr12	66262234	66262234	HMGA2	No	Yes	M	No	No	No	No
chr12	77266621	77266621	CSRP2	No	Yes	B	No	No	No	No
chr12	117580102	117580102		No	No	M	No	No	No	No
chr12	123435962	123435962	ABCB9	No	Yes	M	No	No	No	No
chr12	123436011	123436011	ABCB9	No	Yes	M	No	No	No	No
chr12	123436065	123436065	ABCB9	No	Yes	M	No	No	No	No
chr12	123540893	123540893	PITPNM2	No	Yes	M	No	No	No	No
chr13	20735797	20735797	GJA3	Yes	No	B	No	No	No	No
chr13	23500419	23500419		No	No	B	No	No	No	No
chr13	46771519	46771519		No	No	M	No	No	No	No
chr13	46771520	46771520		No	No	M	No	No	No	No
chr13	53313426	53313426	LECT1	No	Yes	B	No	No	No	No
chr13	113807393	113807393		No	No	B	Yes	Yes	Yes	Yes
chr14	38599118	38599118		No	No	M	No	No	No	No
chr14	65696514	65696514		No	No	B	Yes	Yes	Yes	Yes
chr14	69170010	69170010		No	No	M	Yes	No	Yes	No
chr14	75701632	75701632		No	No	M	No	No	No	No
chr14	75701643	75701643		No	No	M	No	No	No	No
chr14	90850454	90850454		No	No	B	Yes	Yes	Yes	Yes
chr14	97524282	97524282		No	No	B	No	No	No	No
chr14	103541602	103541602		No	No	B	Yes	Yes	Yes	Yes
chr14	103768055	103768055		No	No	M	No	No	No	No
chr14	104209000	104209000	PPP1R13B	No	Yes	B	Yes	Yes	Yes	Yes
chr14	104209068	104209068	PPP1R13B	No	Yes	B	Yes	Yes	Yes	Yes
chr14	104354645	104354645		No	No	M	No	No	No	No
chr14	104360487	104360487		No	No	M	No	Yes	No	Yes
chr15	41068807	41068807	DNAJC17	No	Yes	M	No	No	No	No
chr15	61152225	61152225	RORA	No	Yes	M	No	No	No	No
chr15	61152253	61152253	RORA	No	Yes	M	No	No	No	No
chr15	61152313	61152313	RORA	No	Yes	M	No	No	No	No
chr15	65186440	65186440		No	No	B	Yes	Yes	Yes	Yes
chr15	68851629	68851629		No	No	B	No	No	No	No
chr15	70667596	70667596		No	No	M	No	No	No	No
chr15	70767206	70767206		No	No	M	Yes	No	Yes	No
chr15	75251486	75251486		No	No	B	Yes	Yes	Yes	Yes
chr15	77984014	77984014		No	No	B	No	No	No	No
chr15	77989064	77989064		No	No	M	No	No	No	No
chr15	83952081	83952081	BNC1	No	Yes	B	No	No	No	No
chr15	85402496	85402496	ALPK3	No	Yes	M	No	No	No	No
chr15	85402497	85402497	ALPK3	No	Yes	M	No	No	No	No
chr15	99417337	99417337	IGF1R	No	Yes	M	No	Yes	No	Yes
chr16	1231873	1231873	CACNA1H	No	Yes	M	Yes	Yes	Yes	Yes
chr16	1458639	1458639	UNKL	No	Yes	B	No	Yes	No	Yes
chr16	3023231	3023231	PKMYT1	No	Yes	B	Yes	No	Yes	No
chr16	23135832	23135832	USP31	No	Yes	M	Yes	No	Yes	No
chr16	29616265	29616265		No	No	M	No	No	No	No
chr16	31009547	31009547	STX1B	No	Yes	M	Yes	No	Yes	No
chr16	31009548	31009548	STX1B	No	Yes	M	Yes	No	Yes	No
chr16	31009590	31009590	STX1B	No	Yes	M	Yes	No	Yes	No
chr16	57793674	57793674	KIFC3	No	Yes	M	Yes	No	Yes	No
chr16	57793715	57793715	KIFC3	No	Yes	M	Yes	No	Yes	No
chr16	57793727	57793727	KIFC3	No	Yes	M	Yes	No	Yes	No
chr16	70771056	70771056	VAC14	No	Yes	M	Yes	No	Yes	No
chr16	70771079	70771079	VAC14	No	Yes	M	Yes	No	Yes	No
chr16	70771141	70771141	VAC14	No	Yes	M	Yes	No	Yes	No
chr16	77332010	77332010	ADAMTS18	No	Yes	M	Yes	Yes	Yes	Yes
chr16	78540378	78540378	WWOX	No	Yes	M	Yes	No	Yes	No
chr16	79333435	79333435		No	No	B	No	No	No	No
chr16	84262419	84262419	KCNG4	No	Yes	M	Yes	No	Yes	No
chr16	88701114	88701114		No	No	B	No	No	No	No
chr16	89988308	89988308	TUBB3	Yes	No	B	Yes	No	Yes	No
chr16	89988644	89988644	TUBB3	Yes	No	B	Yes	No	Yes	No
chr17	1509928	1509928	SLC43A2	No	Yes	B	Yes	Yes	Yes	Yes
chr17	1509945	1509945	SLC43A2	No	Yes	B	Yes	Yes	Yes	Yes
chr17	1509952	1509952	SLC43A2	No	Yes	B	Yes	Yes	Yes	Yes
chr17	1509953	1509953	SLC43A2	No	Yes	B	Yes	Yes	Yes	Yes
chr17	7644013	7644013	DNAH2	No	Yes	B	No	No	No	No
chr17	16323460	16323460	TRPV2	No	Yes	M	Yes	Yes	Yes	Yes
chr17	16323473	16323473	TRPV2	No	Yes	M	Yes	Yes	Yes	Yes
chr17	16924561	16924561		No	No	M	Yes	Yes	Yes	Yes
chr17	16924562	16924562		No	No	M	Yes	Yes	Yes	Yes
chr17	16924594	16924594		No	No	M	Yes	Yes	Yes	Yes
chr17	17717918	17717918	MIR33B	Yes	Yes	M	Yes	Yes	Yes	Yes
chr17	17718591	17718591	MIR33B	Yes	Yes	M	Yes	Yes	Yes	Yes
chr17	18139506	18139506	LLGL1	No	Yes	M	No	No	No	No
chr17	35278031	35278031		No	No	B	No	No	No	No
chr17	39677570	39677570		No	No	M	No	No	No	No
chr17	40826257	40826257	PLEKHH3	No	Yes	B	Yes	Yes	Yes	Yes
chr17	43037426	43037426	C1QL1	No	Yes	B	No	No	Yes	Yes
chr17	43200096	43200096	PLCD3	No	Yes	M	No	No	No	No
chr17	43200239	43200239	PLCD3	No	Yes	M	No	No	No	No
chr17	43510142	43510142	SH3D20	Yes	No	B	Yes	No	Yes	No
chr17	47987828	47987828		No	No	B	No	No	No	No
chr17	48178379	48178379	PDK2	No	Yes	M	Yes	Yes	Yes	Yes
chr17	48344865	48344865		No	No	M	Yes	No	Yes	No
chr17	48596391	48596391	MYCBPAP	No	Yes	B	Yes	Yes	Yes	Yes
chr17	48764165	48764165	ABCC3	No	Yes	M	Yes	Yes	Yes	Yes
chr17	55701962	55701962	MSI2	No	Yes	M	Yes	No	Yes	No
chr17	73584599	73584599	MYO15B	Yes	No	B	Yes	Yes	Yes	Yes
chr17	73993165	73993165	C17orf106	No	Yes	M	No	No	No	No
chr17	75827716	75827716		No	No	M	Yes	Yes	Yes	Yes
chr17	76882243	76882243	TIMP2	No	Yes	M	No	No	No	No
chr17	78765910	78765910	RPTOR	No	Yes	M	No	No	No	No
chr17	79544478	79544478	NPLOC4	No	Yes	M	Yes	Yes	Yes	Yes
chr17	80696474	80696474	FN3K	No	Yes	M	No	No	No	No
chr17	80745221	80745221	TBCD	No	Yes	M	No	No	No	No
chr18	19751759	19751759	GATA6	No	Yes	B	No	No	Yes	Yes
chr18	21440760	21440760	LAMA3	No	Yes	M	No	No	No	No
chr18	45555437	45555437	ZBTB7C	No	Yes	M	Yes	Yes	Yes	Yes
chr18	45555438	45555438	ZBTB7C	No	Yes	M	Yes	Yes	Yes	Yes
chr18	46547891	46547891		No	No	M	No	No	No	No
chr18	55888885	55888885	NEDD4L	Yes	Yes	M	No	Yes	No	Yes
chr18	56452096	56452096		No	No	M	No	No	No	No
chr18	56452476	56452476		No	No	M	No	No	No	No
chr18	56887181	56887181	GRP	Yes	No	B	No	No	No	No
chr18	76002973	76002973		No	No	M	No	No	No	No
chr18	77331090	77331090		No	No	M	No	No	No	No
chr19	677895	677895	FSTL3	No	Yes	M	Yes	Yes	Yes	Yes
chr19	884044	884044	MED16	No	Yes	M	No	No	No	No
chr19	884059	884059	MED16	No	Yes	M	No	No	No	No
chr19	884105	884105	MED16	No	Yes	M	No	No	No	No
chr19	884115	884115	MED16	No	Yes	M	No	No	No	No
chr19	1136511	1136511	SBNO2	No	Yes	M	Yes	Yes	Yes	Yes
chr19	1177605	1177605		No	No	M	Yes	Yes	Yes	Yes
chr19	1177612	1177612		No	No	M	Yes	Yes	Yes	Yes
chr19	1177640	1177640		No	No	M	Yes	Yes	Yes	Yes
chr19	1860601	1860601	KLF16	No	Yes	M	Yes	Yes	Yes	Yes
chr19	1860607	1860607	KLF16	No	Yes	M	Yes	Yes	Yes	Yes
chr19	2503954	2503954		No	No	M	No	No	No	No
chr19	3434917	3434917	NFIC	No	Yes	B	Yes	Yes	Yes	Yes
chr19	3434921	3434921	NFIC	No	Yes	B	Yes	Yes	Yes	Yes
chr19	3434930	3434930	NFIC	No	Yes	B	Yes	Yes	Yes	Yes
chr19	3434939	3434939	NFIC	No	Yes	B	Yes	Yes	Yes	Yes
chr19	3434952	3434952	NFIC	No	Yes	B	Yes	Yes	Yes	Yes
chr19	3434954	3434954	NFIC	No	Yes	B	Yes	Yes	Yes	Yes
chr19	3434962	3434962	NFIC	No	Yes	B	Yes	Yes	Yes	Yes
chr19	3434964	3434964	NFIC	No	Yes	B	Yes	Yes	Yes	Yes
chr19	3434979	3434979	NFIC	No	Yes	B	Yes	Yes	Yes	Yes
chr19	3434985	3434985	NFIC	No	Yes	B	Yes	Yes	Yes	Yes
chr19	4052713	4052713	ZBTB7A	No	Yes	M	No	No	No	No
chr19	4052714	4052714	ZBTB7A	No	Yes	M	No	No	No	No
chr19	4052749	4052749	ZBTB7A	No	Yes	M	No	No	No	No
chr19	4374591	4374591	SH3GL1	No	Yes	M	Yes	Yes	Yes	Yes
chr19	5013982	5013982	KDM4B	No	Yes	B	Yes	Yes	Yes	Yes
chr19	5048836	5048836	KDM4B	No	Yes	M	No	No	No	No
chr19	5048867	5048867	KDM4B	No	Yes	M	No	No	No	No
chr19	5048877	5048877	KDM4B	No	Yes	M	No	No	No	No
chr19	8367279	8367279	CD320	No	Yes	M	No	No	No	No
chr19	8428573	8428573	ANGPTL4	Yes	No	B	Yes	Yes	Yes	Yes
chr19	10254577	10254577	DNMT1	No	Yes	M	Yes	No	Yes	No
chr19	10254578	10254578	DNMT1	No	Yes	M	Yes	No	Yes	No
chr19	10463956	10463956	TYK2	No	Yes	B	Yes	No	Yes	No
chr19	10464137	10464137	TYK2	No	Yes	B	Yes	No	Yes	No
chr19	13203671	13203671	NFIX	No	Yes	M	Yes	No	Yes	No
chr19	13266925	13266925		No	No	B	Yes	Yes	Yes	Yes
chr19	13266934	13266934		No	No	B	Yes	Yes	Yes	Yes
chr19	13266970	13266970		No	No	B	Yes	Yes	Yes	Yes
chr19	13842142	13842142		No	No	B	Yes	Yes	Yes	Yes
chr19	14248494	14248494	ASF1B	Yes	No	B	Yes	Yes	Yes	Yes
chr19	15375465	15375465	BRD4	No	Yes	M	Yes	Yes	Yes	Yes
chr19	17218912	17218912	MYO9B	No	Yes	M	No	No	No	No
chr19	17346702	17346702	NR2F6	No	Yes	B	Yes	Yes	Yes	Yes
chr19	17346735	17346735	NR2F6	No	Yes	B	Yes	Yes	Yes	Yes
chr19	18157161	18157161		No	No	M	Yes	Yes	Yes	Yes
chr19	18157221	18157221		No	No	M	Yes	No	Yes	Yes
chr19	18157258	18157258		No	No	M	Yes	No	Yes	Yes
chr19	18415877	18415877		No	No	B	Yes	Yes	Yes	Yes
chr19	18415890	18415890		No	No	B	Yes	Yes	Yes	Yes
chr19	30606642	30606642		No	No	M	No	No	No	No
chr19	35531842	35531842	HPN	Yes	No	B	Yes	Yes	Yes	Yes
chr19	44303112	44303112	LYPD5	No	Yes	B	No	No	No	No
chr19	47173037	47173037		No	No	B	No	No	No	No
chr19	47316268	47316268		No	No	M	No	No	No	No
chr19	47778278	47778278	PRR24	Yes	No	B	Yes	Yes	Yes	Yes
chr19	47778298	47778298	PRR24	Yes	No	B	Yes	Yes	Yes	Yes
chr2	3454277	3454277	TTC15	No	Yes	B	Yes	Yes	Yes	Yes
chr2	8793724	8793724		No	No	B	No	No	No	No
chr2	20412441	20412441	SDC1	No	Yes	M	Yes	Yes	Yes	Yes
chr2	42329402	42329402		No	No	B	Yes	Yes	Yes	Yes
chr2	42329494	42329494		No	No	B	Yes	Yes	Yes	Yes
chr2	55289272	55289272		No	No	B	No	No	No	No
chr2	65064865	65064865		No	No	M	No	No	No	No
chr2	70823641	70823641		No	No	M	Yes	Yes	Yes	Yes
chr2	73143689	73143689	EMX1	Yes	No	B	No	No	No	No
chr2	74454110	74454110	SLC4A5	No	Yes	M	No	No	No	No
chr2	122014529	122014529	TFCP2L1	No	Yes	B	Yes	Yes	Yes	Yes
chr2	128158884	128158884		No	No	M	No	No	No	No
chr2	128158910	128158910		No	No	M	No	No	No	No
chr2	203114171	203114171		No	No	M	No	No	No	No
chr2	218221671	218221671	DIRC3	No	Yes	B	Yes	Yes	Yes	Yes
chr2	219745335	219745335	WNT10A	Yes	No	B	No	No	No	No
chr2	238341465	238341465		No	No	M	Yes	Yes	Yes	Yes
chr2	238341542	238341542		No	No	M	Yes	Yes	Yes	Yes
chr2	238341546	238341546		No	No	M	Yes	Yes	Yes	Yes
chr2	238774763	238774763	RAMP1	No	Yes	M	Yes	No	Yes	No
chr20	31126186	31126186		No	No	M	No	No	No	No
chr20	31126189	31126189		No	No	M	No	No	No	No
chr20	34206950	34206950	SPAG4	No	Yes	B	No	No	Yes	No
chr20	36771969	36771969	TGM2	No	Yes	M	Yes	No	Yes	No
chr20	48993661	48993661		No	No	M	No	No	No	No
chr20	58406398	58406398	PHACTR3	No	Yes	M	No	No	No	No
chr20	61976049	61976049	CHRNA4	No	Yes	M	Yes	No	Yes	No
chr20	61976073	61976073	CHRNA4	No	Yes	M	Yes	No	Yes	No
chr20	62588571	62588571	UCKL1	Yes	Yes	B	No	Yes	No	Yes
chr20	62588579	62588579	UCKL1	Yes	Yes	B	No	Yes	No	Yes
chr21	43810521	43810521	TMPRSS3	Yes	Yes	M	Yes	Yes	Yes	Yes
chr22	19738127	19738127		No	No	M	No	No	No	No
chr22	35965176	35965176		No	No	M	Yes	No	Yes	No
chr22	36549809	36549809	APOL3	No	Yes	M	Yes	No	Yes	Yes
chr22	36973375	36973375	CACNG2	No	Yes	M	No	No	No	No
chr22	37447953	37447953	KCTD17	Yes	No	B	No	No	Yes	No
chr22	37914998	37914998	CARD10	Yes	No	B	No	No	No	No
chr22	38307317	38307317	MICALL1	No	Yes	B	No	No	No	No
chr22	39662794	39662794		No	No	M	No	No	No	No
chr22	42679994	42679994		No	No	B	No	No	No	No
chr22	45622980	45622980	C22orf9	No	Yes	M	No	No	No	No
chr3	13323642	13323642		No	No	B	Yes	No	Yes	No
chr3	14180153	14180153	TMEM43	No	Yes	M	Yes	No	Yes	No
chr3	45209073	45209073		No	No	B	Yes	No	Yes	No
chr3	45209207	45209207		No	No	B	Yes	No	Yes	No
chr3	52525100	52525100	NISCH	No	Yes	M	Yes	No	Yes	No
chr3	62589658	62589658	CADPS	No	Yes	M	No	Yes	No	Yes
chr3	65388317	65388317	MAGI1	No	Yes	M	No	No	No	No
chr3	65388388	65388388	MAGI1	No	Yes	M	No	No	No	No
chr3	73599302	73599302	PDZRN3	No	Yes	M	No	No	No	No
chr3	195636893	195636893	TNK2	Yes	No	B	No	No	No	No
chr3	197093846	197093846		No	No	M	Yes	Yes	Yes	Yes
chr4	3743223	3743223		No	No	M	No	No	No	No
chr4	5755716	5755716	EVC	No	Yes	M	No	No	No	No
chr4	5755717	5755717	EVC	No	Yes	M	No	No	No	No
chr4	5755728	5755728	EVC	No	Yes	M	No	No	No	No
chr4	5755729	5755729	EVC	No	Yes	M	No	No	No	No
chr4	5755734	5755734	EVC	No	Yes	M	No	No	No	No
chr4	8372861	8372861	ACOX3	No	Yes	B	Yes	Yes	Yes	Yes
chr4	57548289	57548289	HOPX	Yes	No	M	Yes	Yes	Yes	Yes
chr4	185304916	185304916		No	No	M	Yes	Yes	Yes	Yes
chr5	1118280	1118280		No	No	M	No	No	No	No
chr5	34564389	34564389		No	No	M	No	Yes	No	Yes
chr5	73871907	73871907		No	No	M	Yes	No	Yes	No
chr5	78013596	78013596		No	No	M	No	No	No	No
chr5	78013643	78013643		No	No	M	No	No	No	No
chr5	137802650	137802650	EGR1	No	Yes	M	Yes	Yes	Yes	Yes
chr5	139051189	139051189	CXXC5	No	Yes	M	Yes	Yes	Yes	Yes
chr5	167838221	167838221	WWC1	No	Yes	M	No	No	No	No
chr5	177541401	177541401	N4BP3	No	Yes	B	No	No	No	No
chr5	180018672	180018672	SCGB3A1	Yes	No	B	No	No	No	No
chr5	180101026	180101026		No	No	B	No	No	No	No
chr6	3394325	3394325	SLC22A23	No	Yes	B	Yes	No	Yes	No
chr6	3887581	3887581		No	No	B	Yes	No	Yes	Yes
chr6	7236568	7236568	RREB1	No	Yes	M	Yes	Yes	Yes	Yes
chr6	7728692	7728692	BMP6	No	Yes	B	No	No	No	No
chr6	34203617	34203617	HMGA1	Yes	No	B	Yes	Yes	Yes	Yes
chr6	37751320	37751320		No	No	B	Yes	Yes	Yes	Yes
chr6	41410682	41410682		No	No	B	Yes	Yes	Yes	Yes
chr6	41438516	41438516		No	No	B	No	No	No	No
chr6	41438575	41438575		No	No	M	No	No	No	No
chr6	43464150	43464150	TJAP1	No	Yes	M	No	No	No	No
chr6	158734279	158734279	TULP4	No	Yes	B	No	No	No	No
chr7	989235	989235	ADAP1	No	Yes	M	No	No	No	No
chr7	2673543	2673543	TTYH3	No	Yes	M	Yes	Yes	Yes	Yes
chr7	73508602	73508602	LIMK1	No	Yes	B	Yes	Yes	Yes	Yes
chr7	105079565	105079565		No	No	M	No	No	No	No
chr7	105079631	105079631		No	No	M	No	No	No	No
chr7	151425103	151425103	PRKAG2	No	Yes	M	No	No	No	No
chr7	151425104	151425104	PRKAG2	No	Yes	M	No	No	No	No
chr8	11764017	11764017		No	No	M	No	No	No	No
chr8	21647308	21647308	GFRA2	Yes	No	B	No	No	No	No
chr8	22548399	22548399	EGR3	No	Yes	B	No	No	No	No
chr8	22548483	22548483	EGR3	No	Yes	B	No	No	No	No
chr8	133570537	133570537		No	No	B	No	No	No	No
chr8	141320393	141320393	TRAPPC9	No	Yes	M	No	Yes	No	Yes
chr8	141320410	141320410	TRAPPC9	No	Yes	M	No	Yes	No	Yes
chr9	6566568	6566568	GLDC	No	Yes	M	No	No	No	No
chr9	16197862	16197862		No	No	B	No	Yes	No	Yes
chr9	34591313	34591313		No	No	B	Yes	No	Yes	No
chr9	98225096	98225096	PTCH1	No	Yes	B	Yes	No	Yes	No
chr9	126126741	126126741	CRB2	No	Yes	M	No	No	No	No
chr9	132083428	132083428	C9orf106	Yes	No	B	Yes	Yes	Yes	Yes
chr9	136077410	136077410		No	No	M	No	No	No	No
chr9	139655018	139655018	LCN15	No	Yes	M	No	No	No	No
chr9	140205985	140205985	EXD3	No	Yes	M	No	No	No	No
chr9	140205989	140205989	EXD3	No	Yes	M	No	No	No	No
chr9	140205997	140205997	EXD3	No	Yes	M	No	No	No	No
