# Supplementary material for: Identification of Tissue-Specific DNA Methylation Signatures for Thyroid Nodule Diagnostics
Source: Oxford University Press journal article supplement (doi:10.1158/1078-0432.ccr-18-0841), 2018-08-09
Supplement: 10780432ccr180841-sup-198566_2_supp_4898122_pcg792.xlsx [file 10780432ccr180841-sup-198566_2_supp_4898122_pcg792.xlsx]

## Sheet: Sheet1
Table S4. DDMS diagnostics for adjacent thyroid tissues. The table contains cancer risk scores according to DDMS, diagnosis according to DDMS and status of nodule to which tissue was adjacent.
sample	Status of nodule to which tissue was adjacent	Pathology	Benign score	Malignant Score	Cancer Risk Score	Diagnosis (DDMS)
1N	Benign	Benign	1	0	N/A	N/A
2N	Benign	Benign	2	0	N/A	N/A
3N	Benign	Benign	0	0	N/A	N/A
4N	Benign	Benign	4	0	N/A	N/A
6N	Benign	Benign	6	0	0.142857	B
7N	Benign	Benign	3	0	N/A	N/A
8N	Benign	Benign	0	0	N/A	N/A
9N	Benign	Benign	2	0	N/A	N/A
10N	Benign	Benign	3	0	N/A	N/A
11N	Benign	Benign	7	1	0.25	B
12N	Benign	Benign	4	0	N/A	N/A
13N	Benign	Benign	70	2	0.0422535	B
15N	Benign	Benign	18	0	0.0526316	B
16N	Benign	Benign	5	0	0.166667	B
17N	Benign	Benign	15	4	0.3125	B
18N	Benign	Benign	3	0	N/A	N/A
19N	Benign	Benign	6	0	0.142857	B
55N	Malignant	Benign	0	12	13	T
56N	Malignant	Benign	2	0	N/A	N/A
58N	Malignant	Benign	2	1	N/A	N/A
61N	Malignant	Benign	6	0	0.142857	B
62N	Malignant	Benign	5	0	0.166667	B
63N	Malignant	Benign	1	0	N/A	N/A
64N	Malignant	Benign	4	0	N/A	N/A
66N	Malignant	Benign	4	0	N/A	N/A
69N	Malignant	Benign	7	0	0.125	B
71N	Malignant	Benign	2	0	N/A	N/A
73N	Malignant	Benign	17	0	0.0555556	B
75N	Malignant	Benign	6	0	0.142857	B
79N	Malignant	Benign	5	0	0.166667	B
80N	Malignant	Benign	0	3	N/A	N/A
101N	Malignant	Benign	0	0	N/A	N/A
102N	Malignant	Benign	0	0	N/A	N/A
103N	Malignant	Benign	1	0	N/A	N/A
105N	Malignant	Benign	1	0	N/A	N/A
106N	Malignant	Benign	3	0	N/A	N/A
107N	Malignant	Benign	4	0	N/A	N/A
109N	Malignant	Benign	1	0	N/A	N/A
112N	Malignant	Benign	5	0	0.166667	B
113N	Malignant	Benign	3	9	2.5	T
116N	Malignant	Benign	2	0	N/A	N/A
117N	Malignant	Benign	4	3	N/A	N/A
